1 **TITLE:**

2 Mandatory membership of community-based mutual health insurance in Senegal: A national survey

3

4 **Short title**

5 Mandatory mutual health insurance in Senegal

6

7 **The Authors:**

8 Valéry Ridde\*, CEPED, IRD-Université de Paris, ERL INSERM SAGESUD, Paris, France; Institute of  
9 Health and Development (ISED), Cheikh Anta Diop University, Dakar, Senegal.

10 Ibrahima Gaye, Institute of Health and Development (ISED), Cheikh Anta Diop University, Dakar,  
11 Senegal.

12 Bruno Ventelou, French National Center for Scientific Research (CNRS), Aix-Marseille School of  
13 Economics, Aix Marseille University, Marseille, France.

14 Elisabeth Paul, Université libre de Bruxelles, School of Public Health, Brussels, Belgium.

15 Adama Faye; Institute of Health and Development (ISED), Cheikh Anta Diop University, Dakar,  
16 Senegal.

17

18 \* valery.ridde@ird.fr

19

20

21

22

23

**NOTE: This preprint reports new research that has not been certified by peer review and should not be used to guide clinical practice.**

24 **ABSTRACT :**

25 With the low adhesion to voluntary mutual health insurance, Senegal's policymakers have sought  
26 to understand the feasibility of compulsory health insurance membership. This study aims to  
27 measure the acceptability of mandatory membership in community-based mutual health insurance  
28 (CBHI) and to understand its possible administrative modalities.

29 The study consists of a national survey among a representative population sample selected by  
30 marginal quotas. The survey was conducted in 2022 over the phone, with the random composition  
31 method among 914 people. The questionnaire measured the socio-economic characteristics of  
32 households, their level of acceptability concerning voluntary and compulsory membership, and their  
33 level of confidence in CBHIs and the health system.

34 Respondents preferred voluntary (86 %) over mandatory (70 %) membership of a CBHI. The gap  
35 between voluntary and compulsory membership scores was smaller among women ( $p=0.040$ ),  
36 people under 35 ( $p=0.033$ ) and people with no health coverage ( $p=0.011$ ). Voluntary or compulsory  
37 membership was correlated ( $p=0.000$ ) to trust in current CBHIs and health systems. No particular  
38 preference emerged as for the preferred administrative channel (e.g. death certificate, identity card,  
39 etc.) which could enable to enforce the mandatory character.

40 The results confirmed the well-known challenges of building universal health coverage on the basis  
41 of CBHIs, a model which is poorly appreciated and whose low performance reduces the acceptability  
42 of populations to adhere to it, be it on a voluntary or mandatory basis. Suppose Senegal persists in  
43 its health insurance approach. In that case, it will be essential to strengthen the performance and  
44 funding of CBHIs, and to gain population trust to enable a mandatory or more systemic membership.

45

46

47 **INTRODUCTION:**

48 In their search for solutions to cover their citizens with health insurance, African countries face many  
49 challenges and have tested various strategies (1). In Francophone West Africa, community-based  
50 health insurance (CBHI) has long been the preferred instrument for covering populations in the  
51 informal and rural sectors (2–4). However, while evidence shows CBHIs protect their members (3,5),  
52 their penetration rates are very low. In Senegal, less than 5 % of the population is affiliated with a  
53 CBHI (6,7) despite membership being subsidized and the fact that they have been at the heart of  
54 the health financing policy for over a decade (8–10). As international organisations and many  
55 experts explain, the voluntary nature of membership and their amateurist management question  
56 the usefulness of CBHIs as a tool for progressing towards universal health coverage (UHC) (11–13).  
57 Since 1952, the International Labour Organization (ILO) Convention 102 on Social Security has  
58 affirmed the importance of compulsory or automatic membership. However, the Regulation on  
59 Social Mutuality of the West African Economic and Monetary Union (WAEMU) recognizes the right  
60 to freely adhere and choose a mutual organization.

61

62 Since 2014, Senegal has experimented a different model of CBHI, consisting in departmental mutual  
63 health insurance managed by professionals, whose coverage rate demonstrate its relevance (14).  
64 Despite being based on voluntary membership, they pave the way for expanding the system through  
65 the adoption of a mandatory membership. However, no research has yet been undertaken in  
66 Senegal to understand the social acceptability of such compulsory membership. The 2017 national  
67 health financing strategy and the 2019 National Health Development Programme (PNDSS 2019-  
68 2028) proposed to study the feasibility of such a mandatory approach (15,16). In particular, the  
69 PNDSS calls *for the promotion of 'mechanisms linking compulsory membership in an insurance*

70 *scheme of one's choice and obtaining certain administrative documents and advantages (driving*  
71 *licence, etc.)*.(16). In 2020, the President of the Republic was suggested to organise a '*smart*  
72 *obligation*' through requesting the proof of one's affiliation to an insurance scheme to benefit from  
73 micro-credit or to carry out administrative acts (17). In Rwanda, for example, health insurance  
74 membership is compulsory, and many people are affiliated to a CBHI, although they are now more  
75 State than Community instruments (18). Senegal was the first African country to ratify ILO  
76 Convention 102 in October 1962, but not in relation to health insurance (19). A national evaluation  
77 undertaken in 2021 (20) presses Senegal to significantly reform its UHC strategies , in particular  
78 through a reevaluation of the systematic nature of membership of departemental mutualhealth  
79 insurance organisations.

80

81 This article aims to measure the propensity of the Senegalese population to accept a potential  
82 obligation to adhere to mutual health insurance and to understand the feasibility of administrative  
83 arrangements.

84

## 85 **MATERIALS AND METHODS**

86 Setting :

87 The study was conducted in the 14 administrative regions of Senegal. The average age in Senegal is  
88 19 years; men account for 49.7 % of the population.

89

90 Population under study:

91 This is a descriptive and analytical cross-sectional study. The data were collected from April 26 to  
92 July 22, 2022. The study population comprised people aged 18 and over in the general population  
93 with a mobile phone number and not already a member of a CBHI.

94

95 Sampling:

96 The study used a marginal quota sampling strategy (21). To ensure a representative population  
97 sample, we performed a precision stratification by region, sex and age group. Following an approach  
98 already used by our team for surveys during the pandemic (22,23), we randomly generated a list of  
99 nine-digit phone numbers from the mobile phone numbers assignable in Senegal using the Random  
100 Dialing (RDD) method. We integrated this list into a Reactive Auto Dialer (RAD) to trigger calls  
101 automatically and optimally. A total of 914 people participated in the study.

102

103 Data collection:

104 Five research assistants speaking the six main languages of Senegal (French, Diola, Wolof, Serère,  
105 Pulaar, Soninké) collected the quantitative data using a close-ended structured questionnaire by  
106 telephone. They administered the questionnaire using tablets with the Open Data Kit (ODK)  
107 software. The final version of the questionnaire was tested during the assistants' training and then  
108 validated by the team members after several corrections. In addition to socio-economic variables  
109 (age, gender, education, marital status, assets), we conceptualised the collected variables according  
110 to the seven dimensions of the Sekhon et al. acceptability model (24), whose previous relevance  
111 was verified in the context of Senegal (22). Each of the seven dimensions was appraised by along a  
112 Likert scale ranging from one (do not agree at all) to five (strongly agree). These dimensions (Table  
113 1) have made it possible to assess the interest of the population in joining a CBHI on a voluntary

114 basis, but also to grab perceptions on a possible mandatory adhesion(Box 1) conditioning the access  
115 to a number of administrative acts (compulsory membership). The proposed channel list  
116 corresponds to Senegal's most frequent administrative acts. The role of trust in the acceptability of  
117 measures has been revealed in our previous studies in Senegal (22) as well as the literature on CBHI  
118 membership (3) and health systems (25). Thus we added two questions about trust in i) existing  
119 CBHIs, and ii) the health system and its ability to protect patients against catastrophic expenditure  
120 in the UHC context.

121 *Table 1 : Operationalisation of the 7 dimensions of acceptability*

| Dimension       | Voluntary membership                                                                                                                                                                  | Compulsory membership                                                                                                                                                                                                    |
|-----------------|---------------------------------------------------------------------------------------------------------------------------------------------------------------------------------------|--------------------------------------------------------------------------------------------------------------------------------------------------------------------------------------------------------------------------|
| Importance      | I have understood the importance of joining a mutual health insurance offered to all on a voluntary basis.                                                                            | I have understood the importance of making membership of a mutual health insurance compulsory in order to carry out administrative acts.                                                                                 |
| Effort          | I will make a great deal of effort to be able to join a mutual health insurance offered to all on a voluntary basis.                                                                  | I will make a great deal of effort to be able to comply with the obligation to join a mutual health insurance to carry out administrative acts.                                                                          |
| Perceptions     | My feelings about the voluntary membership of a mutual health insurance offered to all are positive.                                                                                  | My feelings about this obligation to join a mutual health insurance to carry out administrative acts are positive.                                                                                                       |
| Effectiveness   | I believe that voluntary membership of a mutual health insurance proposed to all will improve the health coverage of Senegalese people.                                               | I believe that making membership of a mutual health insurance compulsory to carry out administrative acts will improve the health coverage of Senegalese people.                                                         |
| Benefits        | I think the benefits that will be derived from voluntary membership of a mutual health insurance offered to all are worth the investment I will have to put forth in order to get it. | I think that the benefits that will be derived from making membership of a mutual health insurance compulsory to carry out administrative acts are worth the investment I will have to put forth in order to respect it. |
| Trust           | I am confident in my ability to join a mutual health insurance offered to all on a voluntary basis.                                                                                   | I am confident in my ability to respect the obligation to join a mutual health insurance to carry out administrative acts.                                                                                               |
| Personal values | Joining a mutual health insurance offered to all on a voluntary basis is in line with my personal values.                                                                             | Making membership of a mutual health insurance compulsory to carry out administrative acts is in line with my personal values.                                                                                           |

122

123

### Box 1: Definition of a CBHI used in the questionnaire

A mutual health insurance is an organisation that receives voluntary (thus non-compulsory) contributions from its members in advance. People pay a membership fee, once in their lifetime at the beginning, then they pay a membership fee each year. It covers a large part (often 80 %) of the costs of healthcare for sick members and their dependents. It does not reimburse contributions if the member or her/his dependents have not been sick.

124

125 Data Analysis:

126 We carried out a descriptive study of the different variables. Qualitative variables were described  
127 through frequency measurements with their confidence intervals, with a 95 % confidence level, and  
128 quantitative data through central trend and dispersion measurements. A cross-sectional analysis  
129 was performed between the dependent and relevant independent variables. Appropriate statistical  
130 tests (Student, Mann-Whitney) were used to measure associations with an alpha risk of 5 %.  
131 Correlations were computed to study the links between the different dimensions. The acceptability  
132 of membership in CBHIs was appreciated by constructing two scores: one for voluntary membership  
133 and one for mandatory membership. These scores were obtained by combining individuals' degrees  
134 of approval for membership of a CBHI offered to all voluntarily, with the benefits derived from such  
135 membership and the compatibility between such membership and personal values. The scores thus  
136 obtained, whose consistency was verified using the Cronbach Alpha Index (0.989 for compulsory  
137 membership and 0.939 for voluntary membership), were standardised to vary between 0 and 100.  
138 All analyses were carried out with the software STATA 14.



139 Ethics approval and consent to participate

140 All individuals were informed of the ethical issues and were allowed to withdraw from the study at  
141 any time. They all agreed to participate through verbal informed consent recorded by the  
142 interviewer under the supervision of the researchers. No minor participated in this research. The  
143 research was accepted by Senegal's National Health Research Ethics Committee  
144 (42/MSAS/CNERS/SP/2021).

145

146 **RESULTS**

147 Most of the sample comprised women (51.3 %) and young people under 35 (54.8 %). A large  
148 proportion (44.7 %) were uneducated (Table 2).

149

*Table 2: Characteristics of respondents (n=914)*

| Variable                  | Number | Percentage |
|---------------------------|--------|------------|
| <b>Gender</b>             |        |            |
| Female                    | 469    | 51.3 %     |
| Male                      | 445    | 48.7 %     |
| <b>Age category</b>       |        |            |
| Under 35 years            | 501    | 54.8 %     |
| 35 years and over         | 413    | 45.2 %     |
| <b>Level of education</b> |        |            |
| Without education         | 409    | 44.7 %     |
| Primary                   | 163    | 17.8 %     |
| Secondary                 | 239    | 26.1 %     |
| Tertiary                  | 103    | 11.3 %     |
| <b>Marital status</b>     |        |            |

|                               |            |                |
|-------------------------------|------------|----------------|
| <b>Married monogamous</b>     | 451        | 49.3 %         |
| <b>Married polygamous</b>     | 142        | 15.5 %         |
| <b>Divorced</b>               | 22         | 2.4 %          |
| <b>Widow(er)</b>              | 38         | 4.2 %          |
| <b>Single</b>                 | 258        | 28.2 %         |
| <b>Refused to say</b>         | 3          | 0.3 %          |
| <b>Quintile of well-being</b> |            |                |
| <b>Poorest</b>                | 182        | 20.0 %         |
| <b>Poor</b>                   | 183        | 20.0 %         |
| <b>Average</b>                | 183        | 20.0 %         |
| <b>Rich</b>                   | 183        | 20.0 %         |
| <b>Richest</b>                | 183        | 20.0 %         |
| <b>Total</b>                  | <b>914</b> | <b>100.0 %</b> |

150

151 Respondents were more in favour of voluntary membership (86 %) of a CBHI than of compulsory  
 152 membership (70 %). The rejection of mandatory membership was significantly more predominant  
 153 among men (59 %), those with higher education (68 %), those covered with a non-mutual health  
 154 insurance (75 %), those distrusting the current functioning of CBHI (76 %), and those with low  
 155 confidence in the government's health system (57 %).

156 The gap between voluntary and compulsory membership scores was significantly smaller among  
 157 women ( $p=0.040$ ), young people under 35 years ( $p=0.033$ ) and people with no health insurance  
 158 ( $p=0.011$ ). The difference did not appear to be influenced by marital status ( $p=0.096$ ), education  
 159 ( $p=0.252$ ), and income ( $p=0.034$ ).

160 Be it regarding voluntary or compulsory membership, a sense of trust played an important role. The  
 161 correlation between trust and membership was unambiguous ( $p=0.000$ ). The more people were

162 confident in the current functioning of CBHI (Figure 1) or in the way in which the State takes care of  
163 its health system (so that it is accessible to all, of quality and without financial consequences for  
164 service users) (Figure 2), the more they were in favour of (voluntary or compulsory) membership.

165

Figure 1: Level of membership score according to confidence (yes/no) in the government as for  
the management of CBHI

Figure 2: Level of membership score according to confidence (low, medium, high) in the current  
health system

166

167 The study did not reveal any particular preference as for the administrative channel that would  
168 make it possible to enforce the mandatory character of adhesion. The level of acceptability (63 % to  
169 65 %) was overall the same if payment would be requested when drawing up a death certificate,  
170 identity card, passport, birth certificate or registration of children in school. Moreover, among those  
171 supporting compulsory membership, the higher their education degree and the less they accept this  
172 principle, regardless of the proposed administrative channel (Table 3). There was no statistically  
173 significant difference in relation to the economic level of the respondents.

174

175

176 Table 3: Preferred administrative channel for enforcing systematic membership, for those in favour  
 177 of the strategy

|                                            | Not educated | Primary | Secondary | Tertiary | P value |
|--------------------------------------------|--------------|---------|-----------|----------|---------|
| Requesting a death certificate             | 93.50%       | 93.50%  | 83.30%    | 82.90%   | 0.008   |
| Applying for a national identity card      | 94.60%       | 95.90%  | 82.90%    | 67.90%   | 0.000   |
| Opening a micro-business                   | 92.40%       | 97.50%  | 86.70%    | 75.90%   | 0.000   |
| Applying for or renewing a passport        | 92.30%       | 94.70%  | 84.60%    | 75.10%   | 0.013   |
| Applying for or renewing a driving licence | 92.40%       | 95.80%  | 87.20%    | 67.00%   | 0.000   |
| Paying income tax                          | 92.40%       | 94.90%  | 87.00%    | 78.80%   | 0.018   |
| Enrolling children in school               | 94.60%       | 96.90%  | 90.20%    | 87.80%   | 0.199   |
| Requesting a birth certificate             | 95.60%       | 96.50%  | 84.30%    | 69.60%   | 0.000   |

178

179 **DISCUSSION:**

180 This study shows that many people declared *intending to* accept the voluntary nature of  
 181 membership in CBHI. This high acceptance of the voluntary nature of the contribution has already  
 182 been revealed in a research on UHC in Burkina Faso (26). Beyond the methodological challenges of  
 183 this survey, the low *current* rate of the total membership in Senegal (1,10) confirms the low  
 184 attractivity of CBHIs to date. Beyond the technical and financial challenges, social representation  
 185 vis-à-vis CBHIs in Africa, particularly in Senegal (27), influences their attractiveness, which does not  
 186 seem sufficiently studied by researchers yet, nor considered by operators (28). Overall, Senegal's  
 187 CBHIs do not yet meet populations' needs, they are still hardly known to them, and their functioning  
 188 is not optimal (8,10,27,29,30). Since the acceptability is even lower as for the mandatory character  
 189 of membership, and closely linked to trust in current (health and CBHI) systems, strengthening CBHIs  
 190 is undoubtedly a prerequisite before any reform.

191 The COVID-19 pandemic and State response measures, notably in Senegal, have emphasised the  
192 importance of citizens' trust in the acceptability of public policies. As with this study, the more  
193 educated people are, the more they question the merits of these measures organised by a State  
194 whose ability to solve their problems better than they do is doubtful (22). The issues of solidarity  
195 and risk-sharing among population groups are at the heart of UHC debates, as surveys elsewhere in  
196 Africa show (26,31). It will be recalled that in Mali, when the government imposed compulsory  
197 insurance for academic professors, they opposed it, and the government had to step back (32). In  
198 addition, considerable research on health systems also confirms the importance of trust between  
199 health professionals (25,33) and also users for the effectiveness of health services as well as  
200 members of CBHIs (34), particularly in Senegal (27). Research in Burkina Faso has shown how central  
201 this trust is to adherence to UHC financial principles (26). This study confirms these results for  
202 Senegal.

203 Expanding population health insurance coverage would improve efficiency and equity in a  
204 fragmented and underfunded Senegalese health system (35), where governance is questioned  
205 (9,36). This also requires improving the overall functioning of the health financing system and  
206 addressing the critical challenges in terms of fiscal space (where can resources for CBHI membership  
207 be found?), the strategic purchasing of health services and the operational efficiency of financial  
208 management (37). In addition, evidence increasingly demonstrates the better performance of  
209 government tax-funded systems over those funded through contributory social insurance (38),  
210 which Senegal should consider. But the failure of CBHIs in Tanzania drove researchers to assert that  
211 *'making health insurance mandatory requires an adequate legal and regulatory framework to help*  
212 *safeguard the mandatory membership and protect a standard Minimum Benefits Package (MBP)*  
213 *and entitlement of members'* (39).

214 Following a recent evaluation (20), the Senegalese National Agency for Universal Health Coverage  
215 launched a significant reform in early 2023. First, it confirmed its announcements at the end of 2022,  
216 and explained that all communal CBHIs would be dissolved and that only departmental CBHIs will  
217 be organised nationwide. In addition to strengthening their professionalisation, this levelling up in  
218 risk pooling has the potential to improve the financial sustainability of health insurance, as has long  
219 been proposed for the region (1,40). Furthermore, the National Agency announced the end of State  
220 subsidies amounting to 50 % of the annual adhesion fees for contributors and to 100 % for non-  
221 contributors. It announced its intent to transform membership subsidy into purchasing CBHI  
222 members' healthcare consumption directly to health facilities. These two major changes have  
223 caused significant tensions with the National Union of CBHI. They may be the consequences of the  
224 fiscal space challenges or a change in government priorities. The future will tell us whether these  
225 reforms increase citizens' confidence in their health and CBHI systems and contribute to rendering  
226 membership more systematic. Even if the policy instrument is unchanged (insurance), it may  
227 illustrate a return of the State (41) in the field of social protection, as has long been demanded (42).  
228 As with the success of CBHIs in Ethiopia, it is essential to give a '*signal of strong political and*  
229 *government commitment*' (43). It may be time to invalidate the conclusion that '*health and health*  
230 *goals might be unimportant to a country's policy choices*' (44).

231

232 The study makes it possible to propose some involvement pathways for Senegal's public health  
233 system that UHC stakeholders discussed during a workshop organised by the National Agency in  
234 December 2022. First, it appears urgent to strengthen the performance of CBHIs and the insurance  
235 system in general before considering making it mandatory. The current reforms (professionalisation,  
236 departmentalisation, digitalisation) should allow this improvement since the new governance

237 structure gives room to community approaches and citizens, strengthening the collective identity  
238 that seems to have been lacking so far in Senegal (45). Even if CBHIs disappear and are transformed  
239 into a health insurance fund, the question of subscription and financing will remain a central  
240 element: *'there is now general agreement in the literature that, for countries to make progress*  
241 *towards UHC, health financing needs to include aspects of both compulsion and redistribution'* (46).  
242 Secondly, there is an urgent need to improve the public's confidence in CBHIs (including services  
243 rendered and reimbursements) and in the health and social protection systems. Finally, Senegal was  
244 able to impose the declaration of the blood type for the realisation of the new digital driving licence  
245 in 2019. Suppose all administrative channels seem possible to enforce the compulsory contribution  
246 for health insurance. In that case, it becomes urgent to check its technical feasibility and to manage  
247 specific communication processes adapted to the targets.

248

249 This research has several limitations. First, given the tiny percentage of people with health insurance  
250 in Senegal (exposure), the questions asked about contributions may have been misunderstood (26)  
251 even if we have clearly explained the definition of CBHIs (Box 1). In addition, the study focuses on  
252 the acceptance of membership in CBHIs rather than on a more general insurance system or on  
253 increasing resources through taxes. Finally, the study was conducted over the telephone and with a  
254 quantitative questionnaire, leaving little room for discussion. This recalls the need for subsequent  
255 qualitative studies to better understand, for example, the possible bias of social desirability, as  
256 mentioned in Burkina Faso (26). This survey method over the telephone also reduced our ability to  
257 have more accurate household socio-economic data for further statistical analysis; the calculation  
258 of the standard of living based on the assets requested over the phone may explain the need for  
259 more relation to the variables of interest.

260 **CONCLUSION**

261 As Senegal embarks on a critical UHC reform process as for its risk pooling system, this research  
262 reveals the strong propensity of citizens to accept the mandatory nature of membership in mutual  
263 health insurance. If the declared rate is high, it poses significant implementation challenges and  
264 provides avenues for reflection for Senegalese policymakers in their quest for universal health  
265 coverage.

266

267 **ACKNOWLEDGMENTS**

268 We want to thank the respondents to the survey and the research assistants for their performance  
269 and dedication to the project: Clara Sadio, Khardiata Kane, Binetou Karfa Camara, Tabaski Diouf,  
270 Coumba Sow.

271

272 **REFERENCE**

- 273 1. Ly MS, Bassoum O, Faye A. Universal health insurance in Africa: a narrative review of the  
274 literature on institutional models. *BMJ Glob Health*. avr 2022;7(4):e008219.
- 275 2. Waelkens MP, Soors W, Criel B. Community Health Insurance in Low- and Middle-Income  
276 Countries. In: *International Encyclopedia of Public Health* [Internet]. Elsevier; 2017 [cité 8 juill  
277 2019]. p. 82-92. Disponible sur:  
278 <https://linkinghub.elsevier.com/retrieve/pii/B9780128036785000825>
- 279 3. Conde KK, Camara AM, Jallal M, Khalis M, Zbiri S, De Brouwere V. Factors determining  
280 membership in community-based health insurance in West Africa: a scoping review. *glob health  
281 res policy*. 28 nov 2022;7(1):46.
- 282 4. Touré L, Boivin P, Diarra Y, Diabaté S, Ridde, Valéry. Innovations in mutuality: challenges



- 283 and learnings for the Universal Health Insurance Plan in Mali. *BMJ Global Health*. 2023;
- 284 5. Haddad S, Ridde V, Yacoubou I, Mak G, Gbetié M. An Evaluation of the Outcomes of Mutual  
285 Health Organizations in Benin. *PLoS ONE*. 2012;7(10 e47136. doi:10.1371/journal.pone.0047136).
- 286 6. Ly MS, Faye A, Ba MF. Impact of community-based health insurance on healthcare  
287 utilisation and out-of-pocket expenditures for the poor in Senegal. *BMJ Open*. déc  
288 2022;12(12):e063035.
- 289 7. Agence Nationale de la Statistique et de la Démographie, ICF. Sénégal : Enquête  
290 Démographique et de Santé Continue (EDS-Continue 2019)—Tableaux [Internet]. Rockville,  
291 Maryland, USA: ANSD et ICF; 2020. Disponible sur:  
292 <https://www.dhsprogram.com/pubs/pdf/FR368/FR368.T.pdf>
- 293 8. Daff BM, Diouf S, Diop ESM, Mano Y, Nakamura R, Sy MM, et al. Reforms for financial  
294 protection schemes towards universal health coverage, Senegal. *Bull World Health Organ*. 1 févr  
295 2020;98(2):100-8.
- 296 9. Paul E, Ndiaye Y, Sall FL, Fecher F, Porignon D. An assessment of the core capacities of the  
297 Senegalese health system to deliver Universal Health Coverage. *Health Policy Open*. déc  
298 2020;1:100012.
- 299 10. Bousmah M al Q, Boyer S, Lalou R, Ventelou B. Reassessing the demand for community-  
300 based health insurance in rural Senegal: Geographic distance and awareness. *SSM - Population*  
301 *Health*. déc 2021;16:100974.
- 302 11. Mathauer I, Mathivet B, Kutzin J. Community based health insurance: how can it contribute  
303 to progress towards UHC ? Geneva, Switzerland: WHO; 2017. 7; WHO/HIS/HGF/PolicyBrief/17.3 p.
- 304 12. Ridde V, Asomaning Antwi A, Boidin B, Chemouni B, Hane F, Touré L. Time to abandon  
305 amateurism and volunteerism: addressing tensions between the Alma-Ata principle of community

306 participation and the effectiveness of community-based health insurance in Africa. *BMJ Global*  
307 *Health*. oct 2018;3(Suppl 3):e001056.

308 13. International Labour Organization. Extending social security to workers in the informal  
309 economy. Lessons from international experience. Geneva: ILO; 2021 p. 205.

310 14. Ridde V, Kane B, Mbow NB, Senghor I, Faye A. The resilience of two departmental health  
311 insurance units during the COVID-19 pandemic in Senegal. *BMJ Global Health*. 1 déc 2022;7(Suppl  
312 9):e010062.

313 15. Ministère de la Santé et de l'Action Sociale. Strategie nationale de financement de la sante  
314 pour tendre vers la couverture sanitaire universelle. Dakar; 2017 p. 34.

315 16. Ministère de la Santé, et de l'Action sociale. Plan National de Développement Sanitaire et  
316 Social (PNDSS) 2019-2028. Dakar; 2019 p. 134.

317 17. Lamine Farba. Une obligation intelligente. Dakar; 2020 p. 2.

318 18. Chemouni B. The political path to universal health coverage: Power, ideas and community-  
319 based health insurance in Rwanda. *World Development*. juin 2018;106:87-98.

320 19. Mayens P. La caisse et l'expert: L'assistance technique du Bureau international du travail  
321 auprès de la caisse des compensations de Dakar (1963-1967). *rhca*. 5 oct 2022;(3):169-79.

322 20. CRES. Les mutuelles de santé dans le système de la couverture maladie universelle du  
323 Sénégal. Dakar: ministère du développement communautaire, de l'équité sociale et territoriale ;  
324 CRES; 2021 p. 86.

325 21. Deville JC. Une théorie des enquêtes par quotas. *Techniques d'enquêtes, Statistique*  
326 *Canada*. 1991;17(2):177-95.

327 22. Ridde V, Kane B, Gaye I, Ba MF, Diallo A, Bonnet E, et al. Acceptability of government  
328 measures against COVID-19 pandemic in Senegal: A mixed methods study. Mahendradhata Y,

- 329 éditeur. PLOS Glob Public Health. 25 avr 2022;2(4):e0000041.
- 330 23. Ba MF, Faye A, Kane B, Diallo AI, Junot A, Gaye I, et al. Factors associated with COVID-19  
331 vaccine hesitancy in Senegal: A mixed study. Human Vaccines & Immunotherapeutics. 30 nov  
332 2022;18(5):2060020.
- 333 24. Sekhon M, Cartwright M, Francis JJ. Acceptability of healthcare interventions: an overview  
334 of reviews and development of a theoretical framework. BMC Health Services Research.  
335 2017;17:88.
- 336 25. Gilson L. Trust in health care: theoretical perspectives and research needs. J Health Organ  
337 Manag. 2006;20(5):359-75.
- 338 26. Agier I, Ly A, Kadio K, Kouanda S, Ridde V. Endorsement of universal health coverage  
339 financial principles in Burkina Faso. Social Science & Medicine. févr 2016;151:157-66.
- 340 27. Mladovsky P, Ndiaye P, Ndiaye A, Criel B. The impact of stakeholder values and power  
341 relations on community-based health insurance coverage: qualitative evidence from three  
342 Senegalese case studies. Health Policy and Planning. 1 juill 2015;30(6):768-81.
- 343 28. Kalolo A, Gautier L, De Allegri M. Exploring the role of social representations in micro-  
344 health insurance scheme enrolment and retainment in sub-Saharan Africa: a scoping review.  
345 Health Policy and Planning. 3 août 2022;37(7):915-27.
- 346 29. Rouyard T, Mano Y, Daff BM, Diouf S, Fall Dia K, Duval L, et al. Operational and Structural  
347 Factors Influencing Enrolment in Community-Based Health Insurance Schemes: An Observational  
348 Study Using 12 Waves of Nationwide Panel Data from Senegal. Health Policy and Planning. 12 avr  
349 2022;czac033.
- 350 30. Diop MA. « Encore un luxe ! ». Émulations [Internet]. 15 déc 2019 [cité 14 févr 2023];  
351 Disponible sur: [https://ojs.uclouvain.be/index.php/emulations/article/view/diop\\_varia](https://ojs.uclouvain.be/index.php/emulations/article/view/diop_varia)

- 352 31. Goudge J, Akazili J, Ataguba J, Kuwawenaruwa A, Borghi J, Harris B, et al. Social solidarity  
353 and willingness to tolerate risk- and income-related cross-subsidies within health insurance:  
354 experiences from Ghana, Tanzania and South Africa. *Health policy and planning*. mars 2012;27  
355 Suppl 1:i55-63.
- 356 32. Goita SO. Les difficultés de mise en place de l'assurance maladie obligatoire au Mali : le cas  
357 des enseignants du supérieur. *Revue française des affaires sociales*. 2018;(1):199-204.
- 358 33. Durand F, Ridde V, Touré L, Coulibaly A. The moderating role of support for innovation in  
359 sub-Saharan African healthcare teams: a multilevel perspective. *Current Psychology [Internet]*. 23  
360 févr 2023; Disponible sur: <https://doi.org/10.1007/s12144-023-04341-6>
- 361 34. Dror DM, Hossain SAS, Majumdar A, Pérez Koehlmoos TL, John D, Panda PK. What Factors  
362 Affect Voluntary Uptake of Community-Based Health Insurance Schemes in Low- and Middle-  
363 Income Countries? A Systematic Review and Meta-Analysis. Weary D, éditeur. *PLOS ONE*. 31 août  
364 2016;11(8):e0160479.
- 365 35. Mladovsky P. Fragmentation by design: Universal health coverage policies as  
366 governmentality in Senegal. *Social Science & Medicine*. sept 2020;260:113153.
- 367 36. Ridde V, Faye A. Policy response to COVID-19 in Senegal: power, politics, and the choice of  
368 policy instruments. *Policy Design and Practice*. 2022;1-20.
- 369 37. Paul E, Sambiéni NE, Wangbe JP, Fecher F, Bourgeois M. Budgeting challenges on the path  
370 towards universal health coverage: the case of Benin. *Health Econ Rev*. déc 2020;10(1):28.
- 371 38. Gabani J, Mazumdar S, Suhrcke M. The effect of health financing systems on health system  
372 outcomes: A cross-country panel analysis. *Health Economics*. mars 2023;32(3):574-619.
- 373 39. Kigume R, Maluka S. The failure of community-based health insurance schemes in  
374 Tanzania: opening the black box of the implementation process. *BMC Health Serv Res*. déc

375 2021;21(1):646.

376 40. Criel B. District-based health insurance in sub-saharian Africa, Part II,. Antwerp, Belgium:  
377 ITG Press; 1998. 91 p. (De Brouwere V, Kegels G, Van Lerberghe W. Studies in health services  
378 organisation & policy).

379 41. Mladovsky P, Prince R, Hane F, Ridde V. The primacy of politics in neoliberal universal  
380 health coverage policy reform. A commentary on ‘Financing and Provision of Healthcare for Two  
381 Billion People in Low-Income Nations: Is the Cooperative Healthcare Model a Solution?’ by  
382 William C Hsiao and Winnie Yip. Social Science & Medicine. janv 2023;115742.

383 42. Boidin B. Extension de l’assurance maladie et rôle des mutuelles de santé en Afrique: les  
384 leçons de l’expérience sénégalaise. Économie publique/Public economics. 2012;(28-29):47-70.

385 43. Alemu G, Shigute Z, Mebratie A, Sparrow R, Bedi AS. On the functioning of community-  
386 based health insurance schemes in rural Ethiopia. Social Science & Medicine. janv 2023;115739.

387 44. Savedoff WD. Addiction to a Bad Idea, Contributory Health Systems – A Comment. Social  
388 Science & Medicine. févr 2023;115762.

389 45. Alenda-Demoutiez J, Boidin B. Community-based mutual health organisations in Senegal: a  
390 specific form of social and solidarity economy? Review of Social Economy. 2 oct  
391 2019;77(4):417-41.

392 46. Tandon A, Hoang-Vu Eozenou P, Neelsen S. Compulsion and redistribution remain key  
393 tenets for financing universal health coverage. Social Science & Medicine. janv 2023;115744.

394

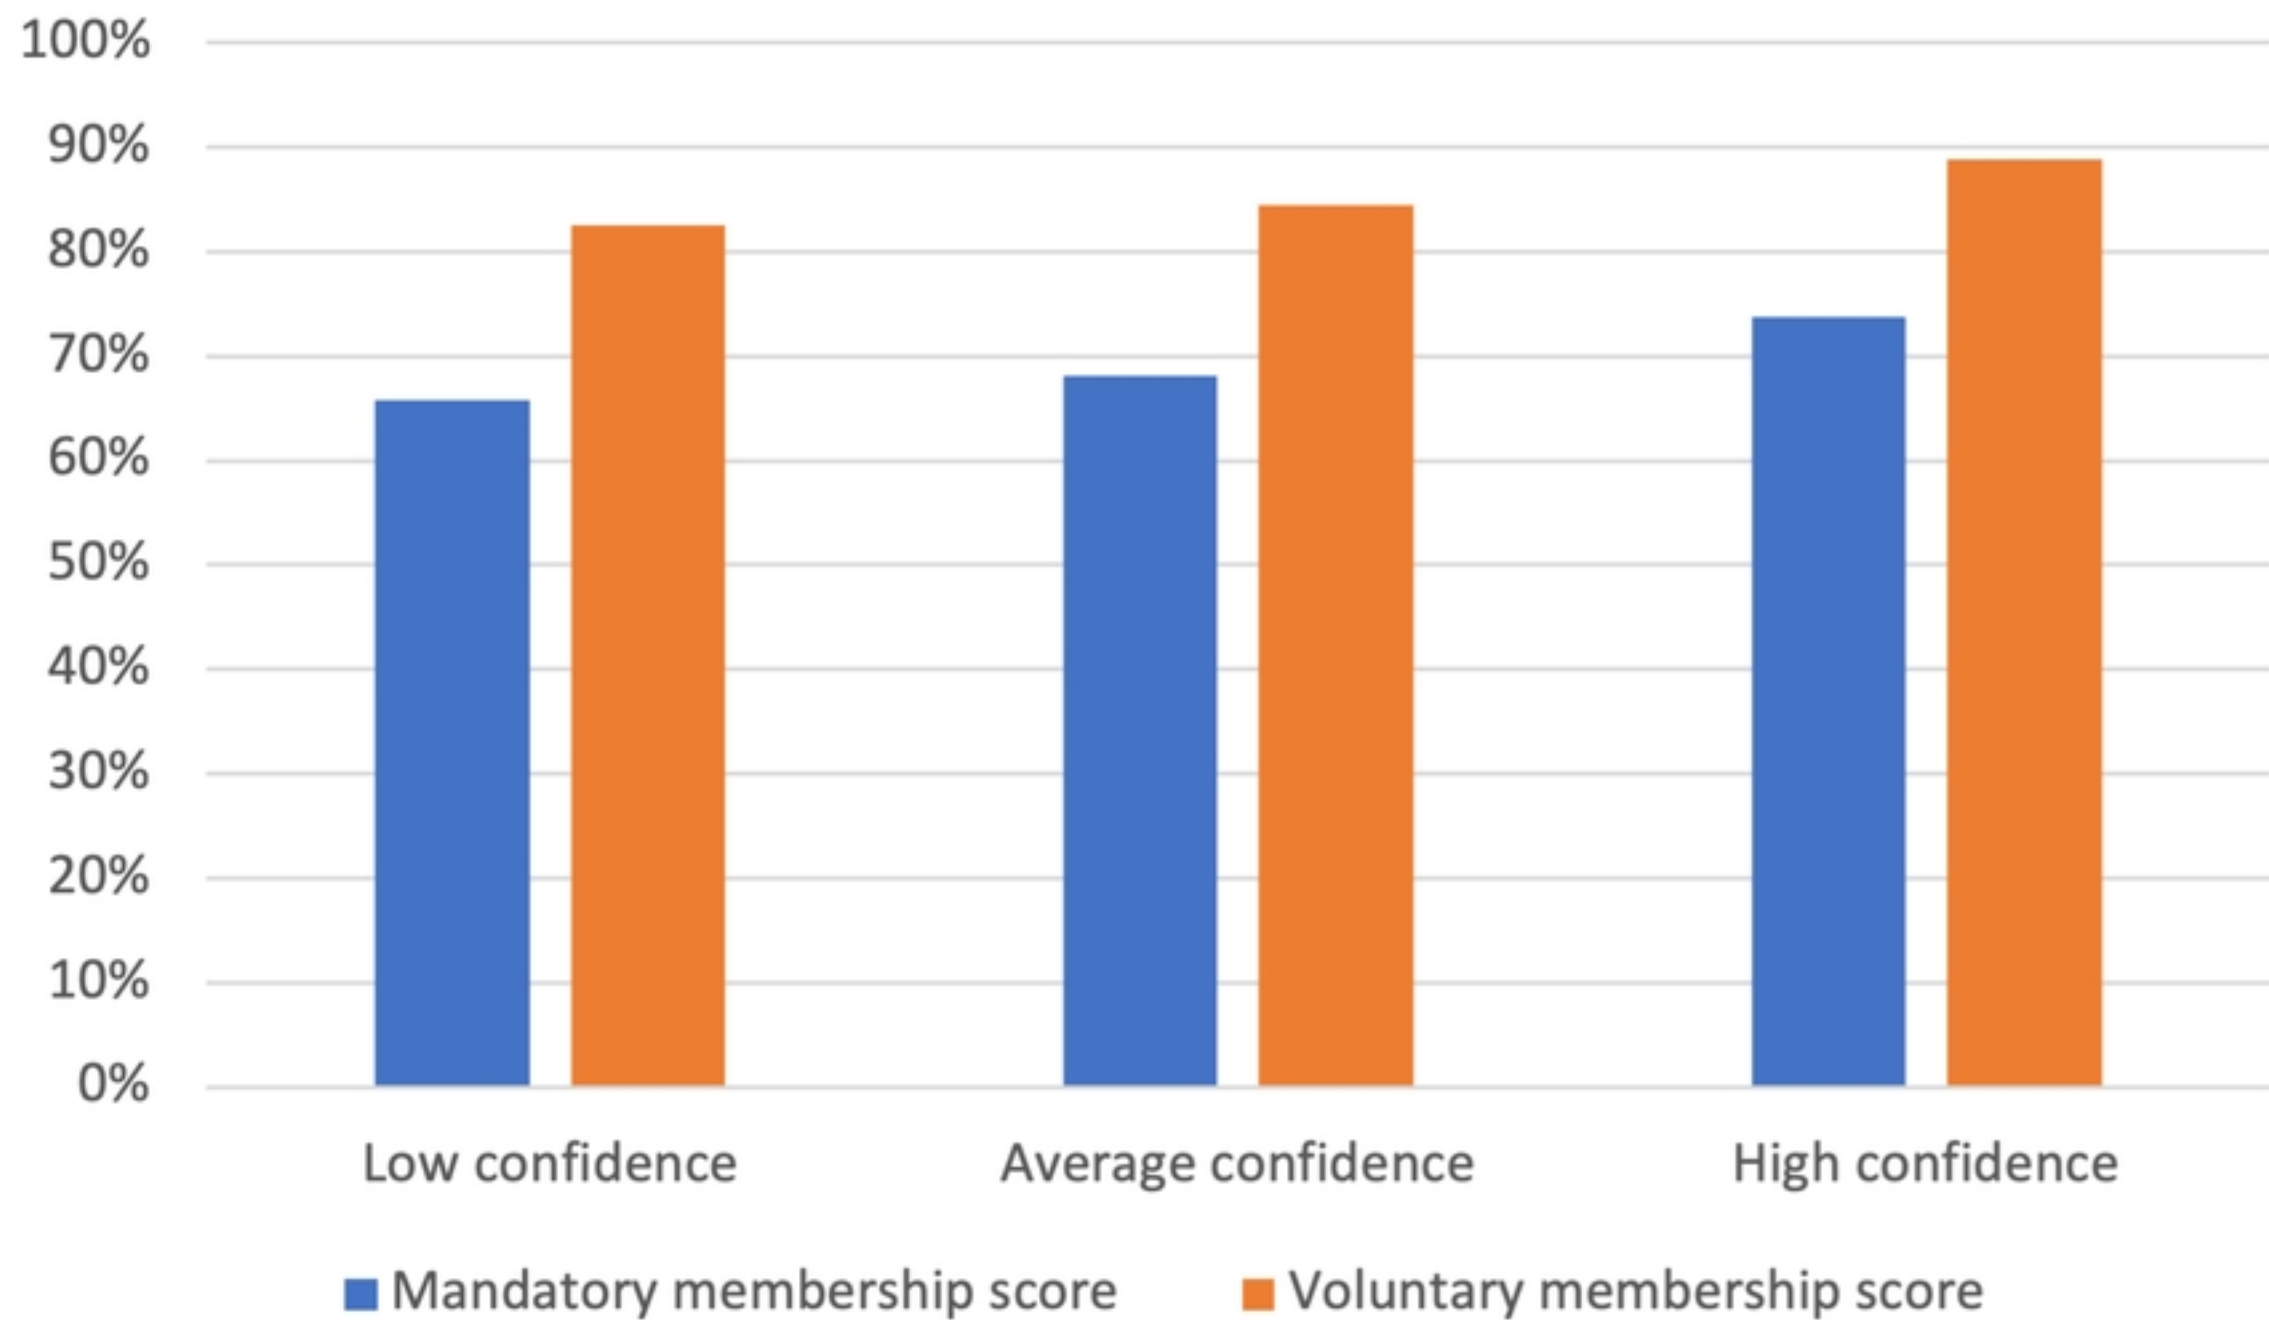

Fig 2

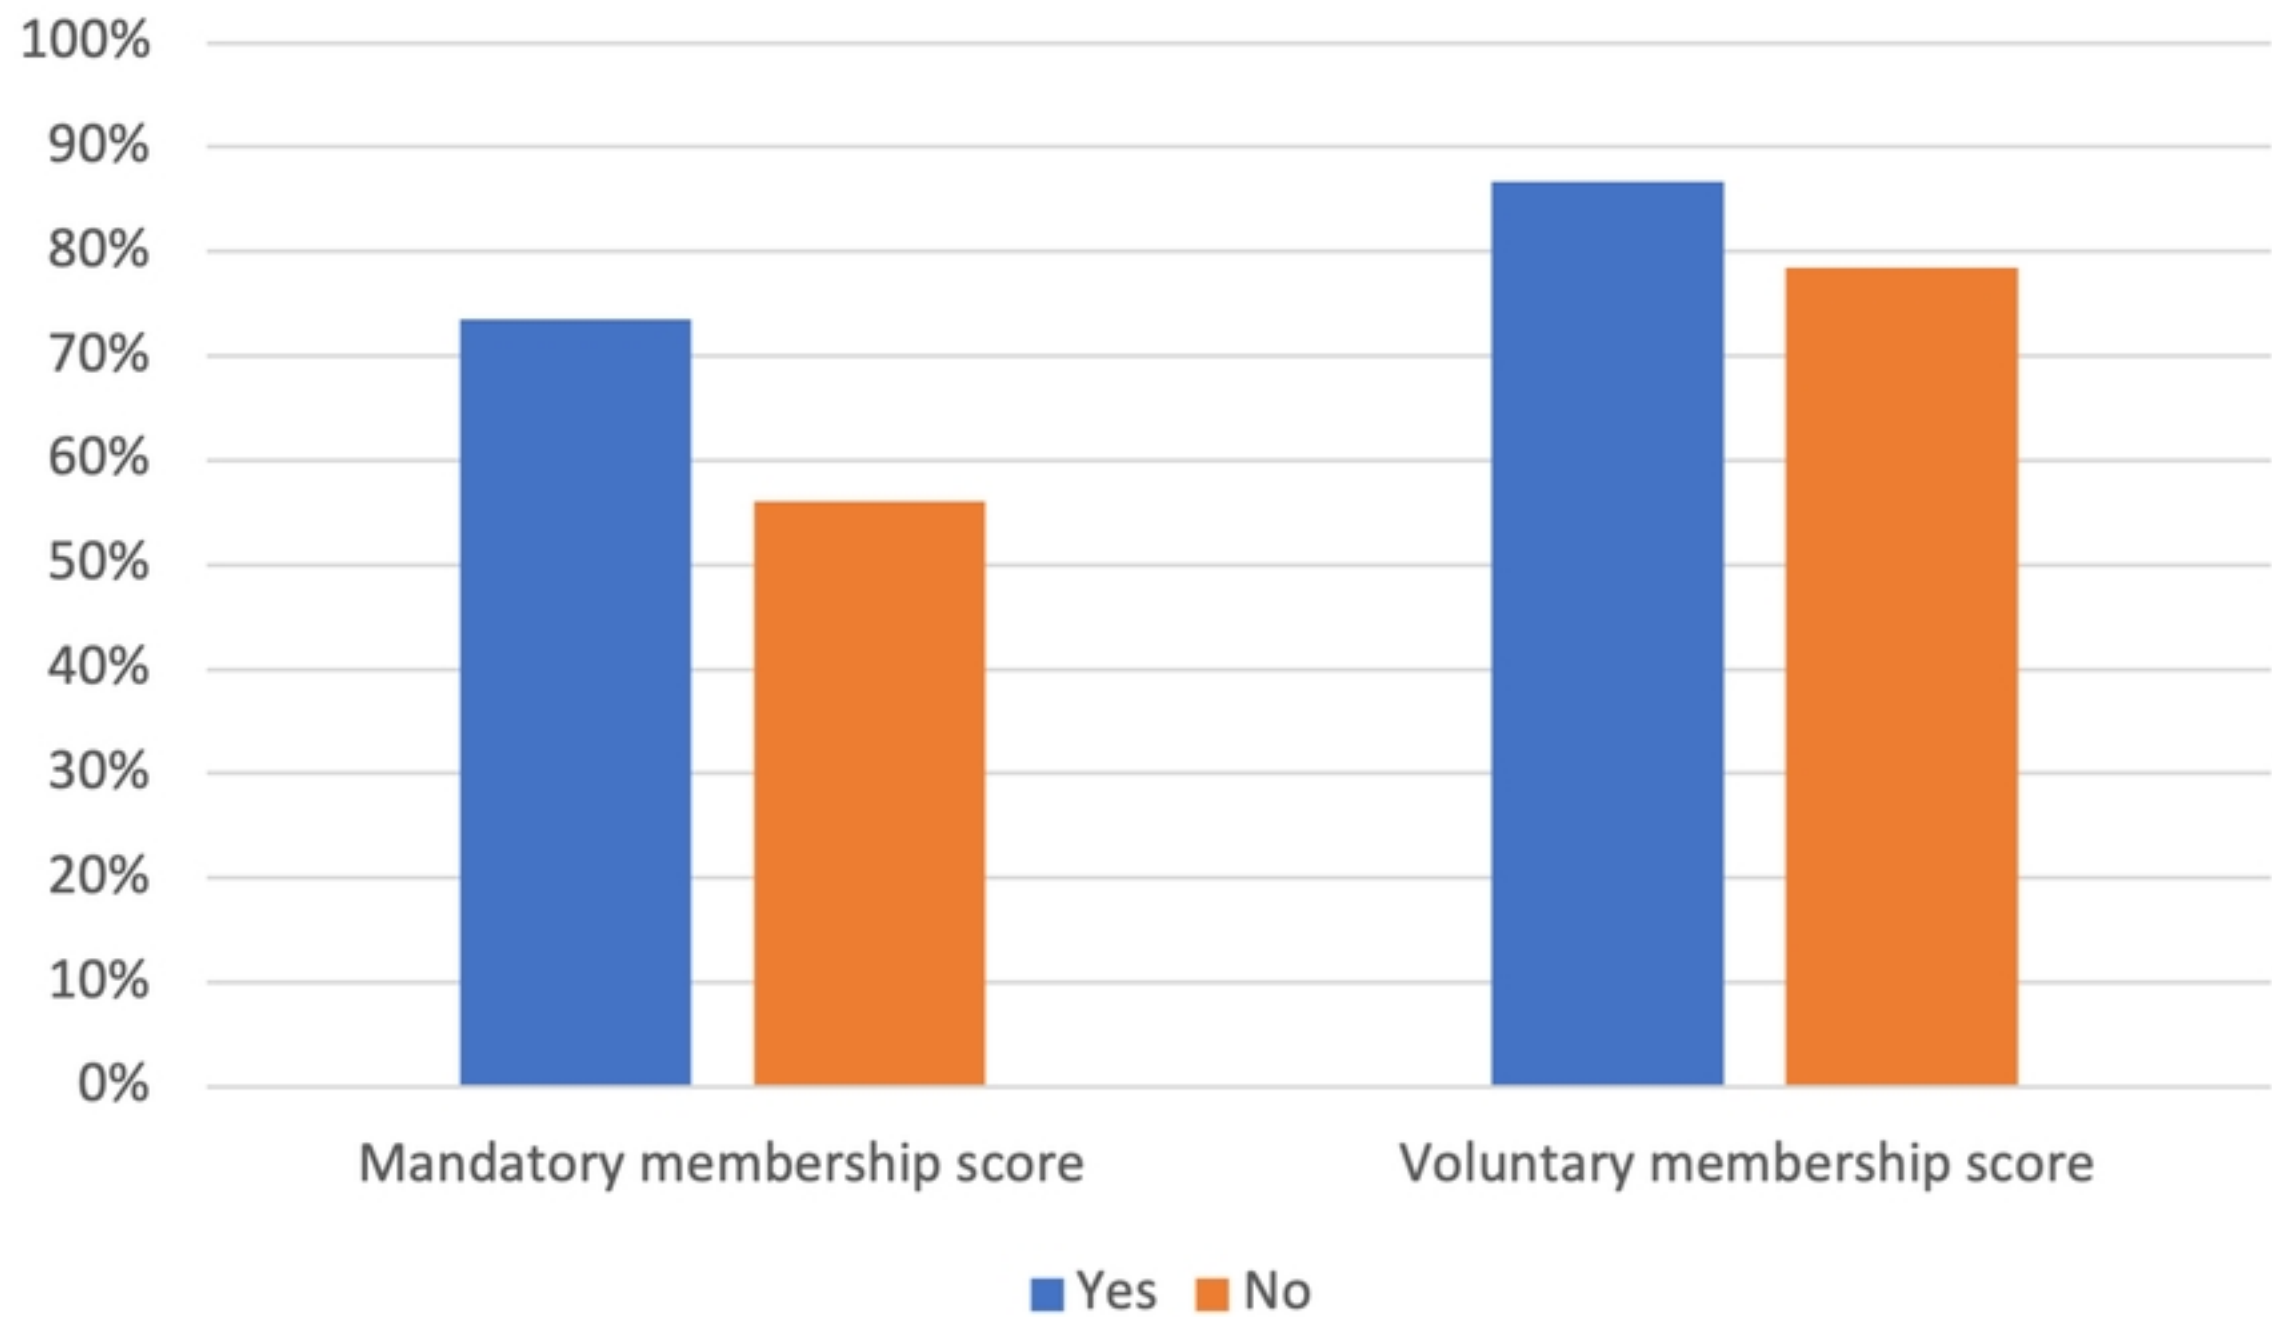

Fig 1
